# Supplementary material for: Correction: Modelled health benefits of a sugar-sweetened beverage tax across different socioeconomic groups in Australia: A cost-effectiveness and equity analysis
Source: PubMed Central journal article supplement (PMC7390261; doi:10.1371/journal.pmed.1003310), 2020-07-29
Supplement: pmed.1003310.s001.pdf [file pmed.1003310.s001.pdf]

**S4 Table. Cost effectiveness results of the sensitivity analyses**

|                                                                            | Quintile 1<br>(95%CI)   | Quintile 2<br>(95%CI)   | Quintile 3<br>(95%CI)   | Quintile 4<br>(95%CI)   | Quintile 5 (95%CI)      | Total<br>(95%CI)              |
|----------------------------------------------------------------------------|-------------------------|-------------------------|-------------------------|-------------------------|-------------------------|-------------------------------|
| <b>20% sugar-sweetened beverage tax including flavoured milk</b>           |                         |                         |                         |                         |                         |                               |
| Total HALYs saved over lifetime (thousands)                                | 58.1<br>(18.0, 97.7)    | 54.9<br>(32.9, 76.7)    | 54.6<br>(22.9, 85.4)    | 34.9<br>(30.1, 40.6)    | 28.2<br>(12.2, 44.3)    | 192.7<br>(75.8, 301.2)        |
| Total years of life saved over lifetime (thousands)                        | 44.3<br>(13.6, 72.9)    | 41.0<br>(24.76.7 )      | 41.1<br>(17.2, 63.8)    | 25.9<br>(23.0, 29.3)    | 21.7<br>(10.0, 33.6)    | 121.1<br>(47.8, 189.9)        |
| Total healthcare cost savings over lifetime (millions of dollars)          | 473.0<br>(145.6, 767.5) | 473.1<br>(286.5, 656.4) | 476.2<br>(196.9, 738.6) | 325.0<br>(273.6, 381.5) | 260.3<br>(111.6, 407.7) | 1,951.4<br>(1,687.2, 2,218.3) |
| Net cost per HALY saved                                                    | Cost saving             | Cost saving             | Cost saving             | Cost saving             | Cost saving             | Cost saving                   |
| Out-of-pocket healthcare costs saved over lifetime (millions of dollars)   | 40.2<br>(34.8, 45.7)    | 40.7<br>(35.2,46.3)     | 57.8<br>(50.0, 65.8)    | 79.3<br>(68.6, 90.2)    | 121.4<br>(105.0, 138.0) | 339.5<br>(293.6, 386.0)       |
| Out-of-pocket costs of tax (dollars per person, yearly)                    | 40.90<br>(24.80, 64.0)  | 37.30<br>(22.80, 57.70) | 33.30<br>(19.50, 51.60) | 30.60<br>(17.80, 49.40) | 33.20<br>(20.50, 51.10) | 34.10<br>(20.80, 53.40)       |
| % expenditure food and non-alcoholic drinks                                | 0.62%                   | 0.40%                   | 0.30%                   | 0.25%                   | 0.23%                   | 0.32%                         |
| <b>50% pass-through of 20% sugar-sweetened beverage tax (10% tax rate)</b> |                         |                         |                         |                         |                         |                               |
| Total HALYs saved over                                                     | 29.2                    | 27.3                    | 27.1                    | 16.5                    | 14.7                    | 89.0                          |

|                                                                          |                         |                         |                         |                         |                         |                              |
|--------------------------------------------------------------------------|-------------------------|-------------------------|-------------------------|-------------------------|-------------------------|------------------------------|
| lifetime (thousands)                                                     | (26.1, 32.6)            | (4.6, 49.1)             | (10.9, 43.7)            | (14.1, 19.3)            | (13.2, 16.4)            | (33.6, 144.8)                |
| Total years of life saved over lifetime (thousands)                      | 22.1<br>(20.9, 23.4)    | 20.3<br>(3.4, 36.3)     | 20.5<br>(8.4, 32.7)     | 12.2<br>(10.8, 13.9)    | 11.2<br>(10.5, 12.0)    | 61.5<br>(23.8, 99.2)         |
| Total healthcare cost savings over lifetime (millions of dollars)        | 238.5<br>(211.4, 265.0) | 235.7<br>(40.3, 154.0)  | 236.8<br>(95.4, 376.9)  | 154.0<br>(129.8, 181.7) | 133.7<br>(118.0, 151.3) | 957.5<br>(829.8, 1,102)      |
| Net cost per HALY saved                                                  | Cost saving             | Cost saving             | Cost saving             | Cost saving             | Cost saving             | Cost saving                  |
| Out-of-pocket healthcare costs saved over lifetime (millions of dollars) | 19.7<br>(17.1, 22.7)    | 20.0<br>(17.3, 23.0)    | 28.4<br>(24.6, 32.7)    | 38.9<br>(33.7, 44.8)    | 59.6<br>(51.6, 68.6)    | 166.6<br>(144.4, 191.8)      |
| Out-of-pocket costs of tax (dollars per person, yearly)                  | 20.7<br>(12.40, 31.80)  | 17.10<br>(12.50, 22.60) | 17.90<br>(11.30, 27.40) | 15.70<br>(9.30, 25.10)  | 17.20<br>(10.60, 26.30) | 16.90<br>(10.30, 25.80)      |
| % expenditure food and non-alcoholic drinks                              | 0.31%                   | 0.18%                   | 0.16%                   | 0.13%                   | 0.12%                   | 0.32%                        |
| <b>30% sugar-sweetened beverage tax</b>                                  |                         |                         |                         |                         |                         |                              |
| Total HALYs saved over lifetime (thousands)                              | 70.5<br>(23.3, 112.6)   | 69.4<br>(47.1, 92.3)    | 66.2<br>(27.1, 100.0)   | 43.8<br>(37.5, 51.5)    | 38.5<br>(17.5, 58.0)    | 224.5<br>(91.6, 346.0)       |
| Total years of life saved over lifetime (thousands)                      | 53.9<br>(17.9, 85.6)    | 51.9<br>(35.6, 68.1)    | 50.2<br>(20.3, 75.9)    | 32.6<br>(28.7, 37.0)    | 29.5<br>(13.6, 43.9)    | 155.5<br>(62.9, 238.7)       |
| Total healthcare cost savings over lifetime (millions of dollars)        | 574.4<br>(195.7, 919.7) | 598.6<br>(405.8, 788.3) | 576.1<br>(233.2, 865.6) | 407.4<br>(341.1, 480.2) | 352.3<br>(164.4, 536.2) | 2501.4<br>(2,181.9, 2,820.4) |
| Net cost per HALY saved                                                  | Cost saving             | Cost saving             | Cost saving             | Cost saving             | Cost saving             | Cost saving                  |

|                                                                          |                         |                         |                         |                         |                         |                           |
|--------------------------------------------------------------------------|-------------------------|-------------------------|-------------------------|-------------------------|-------------------------|---------------------------|
| Out-of-pocket healthcare costs saved over lifetime (millions of dollars) | 51.6<br>(6.1, 45.0)     | 52.2<br>(6.2, 45.5)     | 74.2<br>(8.8, 64.7)     | 101.7<br>(12.1,88.7)    | 155.6<br>(18.4,135.7)   | 435.2<br>(379.7, 490.8)   |
| Out-of-pocket costs of tax (dollars per person, yearly)                  | 51.40<br>(39.10, 67.90) | 47.10<br>(36.10, 61.10) | 49.60<br>(37.90, 62.70) | 46.70<br>(38.30, 56.90) | 33.50<br>(20.70, 51.00) | 51.20<br>(31.20, 80.10)   |
| % expenditure food and non-alcoholic drinks                              | 0.78%                   | 0.50%                   | 0.45%                   | 0.39%                   | 0.23%                   | 0.48%                     |
| <b>50c per litre tax</b>                                                 |                         |                         |                         |                         |                         |                           |
| Total HALYs saved over lifetime (thousands)                              | 30.4<br>(4.4, 54.7)     | 31.0<br>(4.0, 58.2)     | 33.2<br>(13.1, 51.3)    | 20.3<br>(17.5, 23.6)    | 12.7<br>(5.9, 19.5)     | 167.5<br>(148.5, 189.6)   |
| Total years of life saved over lifetime (thousands)                      | 23.1<br>3.4, 42.2       | 23.2<br>2.8, 43.3       | 25.1<br>10.0, 39.1      | 15.0<br>13.3, 16.9      | 9.7<br>4.5, 14.9        | 116.0<br>108.8, 122.9     |
| Total healthcare cost savings over lifetime (millions of dollars)        | 248.2<br>34.8, 445.5    | 264.3<br>38.4, 486.3    | 289.1<br>117.3, 456.4   | 188.9<br>159.5, 220.1   | 116.4<br>53.2, 180.7    | 1,141.0<br>989.8, 1,309.7 |
| Net cost per HALY saved                                                  | Cost saving             | Cost saving             | Cost saving             | Cost saving             | Cost saving             | Cost saving               |
| Out-of-pocket healthcare costs saved over lifetime (millions of dollars) | 23.5<br>(20.4, 27.0)    | 23.8<br>(20.6, 27.3)    | 33.8<br>(29.3, 38.8)    | 46.4<br>(40.2, 53.2)    | 71.0<br>(61.6, 81.5)    | 198.5<br>(172.2, 227.9)   |
| Out-of-pocket costs of tax (dollars per person, yearly)                  | 34.40<br>(31.90, 37.00) | 27.80<br>(25.00, 30.90) | 30.50<br>(26.80, 34.70) | 23.60<br>(20.60, 26.70) | 25.70<br>(23.70, 27.90) | 25.80<br>(23.80, 27.80)   |
| % expenditure food and non-alcoholic drinks                              | 0.32%                   | 0.42%                   | 0.33%                   | 0.21%                   | 0.21%                   | 0.18%                     |
